# Supplementary material for: The Baltic Sea Model Intercomparison Project (BMIP) – a platform for model development, evaluation, and uncertainty assessment
Source: Copernicus journal article supplement (doi:10.5194/gmd-15-8613-2022), 2022-11-25
Supplement: Supplementary file 1 [file S6_bmip_instructions_final_2022-06-13.pdf › S6_bmip_instructions_final_2022-06-13.pdf]

### **Determination of model setups:**

Same atmospheric forcing: UERRA + corrections

Same river input: E-HYPE

Recommendation for Spinup: from 1961 to 01.07.2004, then restart from beginning

Horizontal resolution: preferable: max. 2 nm, mandatory: at least not coarser than 10 km

Vertical resolution: preferable: max. 2 m

Temporal coverage: as long as possible (Jan 1961 – Dec 2018; at least Jan 1978 – Dec 2017 (40 years))

### **Input data (model forcing):**

Can be found at the IOW thredds server:

[https://thredds-iow.io-warnemuende.de/thredds/catalogs/projects/bmip/catalog\\_bmip.html](https://thredds-iow.io-warnemuende.de/thredds/catalogs/projects/bmip/catalog_bmip.html)

Here you find three datasets for download:

1. River forcing (based on E-HYPE data), which is described in the following document in detail: “Geromo Väli, H.E. Markus Meier, Manja Placke, Christian Dieterich: River runoff forcing for ocean modeling within the Baltic Sea Model Intercomparison Project. Meereswiss. Ber., Warnemünde, 113(2019), doi:10.12754/msr-2019-0113”
2. Atmospheric forcing: UERRA data generated using Copernicus Climate Change Service information [2019], see <https://cds.climate.copernicus.eu/cdsapp#!/dataset/reanalysis-uerra-europe-complete?tab=overview>. **These require the following changes before used as model forcing:** Precipitation contains negative values which should be set to zero. Also, precipitation should be multiplied by a factor of 0.8 to correct for a wet bias.
3. Cloudiness: Since UERRA cloudiness is corrupted, we suggest to use coastDat-2 cloudiness for those models which require it as a forcing. Please cite the dataset like this: “Geyer, B., 2014. High-resolution atmospheric reconstruction for Europe 1948-2012: coastDat2. Earth System Science Data 6, 147.”

To access the data, you can e.g. use the following command:

```
ncdump -h "https://thredds-iow.io-warnemuende.de/thredds/dodsC/BMIP/IOW-THREDDS-BMIP_uerra_forcing_2019-10-21-11-lwdrad.nc"
```

It is important that the software you use is linked to a new NetCDF version (from 4.6 on) since otherwise the https connection will fail.

### **Data output in NetCDF files:**

The following table lists the output variables you should write out. **Red** means that here something is important and not obvious. **Yellow** means that names which do not follow the cdf conventions had to be used.

For some data we state “separate algorithm attached”. We provide these algorithms as well as the table with the coordinates of stations, transects and upwelling areas under the following link:

<https://owncloud.io-warnemuende.de/index.php/s/LVZbDvSvcTnECpb>

The password is “Ws5Km1it3de4Qt2”.

| Planned data output                                  |                   | Variable name | Description                        | Dimension |                | Unit           | Time step             | <a href="http://cfconventions.org/cf-conventions/cf-conventions.html">http://cfconventions.org/cf-conventions/cf-conventions.html</a> ,<br><a href="http://cfconventions.org/Data/cf-standard-names/60/build/cf-standard-name-table.html">http://cfconventions.org/Data/cf-standard-names/60/build/cf-standard-name-table.html</a> |
|------------------------------------------------------|-------------------|---------------|------------------------------------|-----------|----------------|----------------|-----------------------|------------------------------------------------------------------------------------------------------------------------------------------------------------------------------------------------------------------------------------------------------------------------------------------------------------------------------------|
| <b>Time axis</b>                                     | Time              | time          | Time axis in hours, days or months | 1D        |                | days           | Dependent on variable | double time(time) ;<br>time:long_name = "time" ;<br>time:units = "days since 1900-01-01 00:00:00" ;<br>time:calendar = "gregorian"                                                                                                                                                                                                 |
| <b>Model grid</b>                                    | Latitude          | lat           | Latitude range of model domain     | 1D        |                | degree         | -                     | double lat(lat) ;<br>lat:long_name = "latitude" ;<br>lat:units = "degrees_north" ;<br>lat:standard_name = "latitude" ;<br>lat:unit_long = "Degrees North" ;<br>lat:axis = "Y" ;                                                                                                                                                    |
|                                                      | Longitude         | lon           | Longitude range of model domain    | 1D        |                | degree         | -                     | double lon(lon) ;<br>lon:long_name = "longitude" ;<br>lon:units = "degrees_east" ;<br>lon:standard_name = "longitude" ;<br>lon:unit_long = "Degrees East" ;<br>lon:axis = "X" ;                                                                                                                                                    |
|                                                      | Depth             | depth         | Depth                              | 1D        |                | m              | -                     | double depth(depth) ;<br>depth:long_name = "depth" ;<br>depth:standard_name = "depth" ;<br>depth:units = "meters" ;<br>depth:positive = "down" ;<br>depth:unit_long = "meters" ;<br>depth:axis = "Z"                                                                                                                               |
|                                                      | Area              | areao         | Area of the ocean grid cell        | 2D        | lat, lon       | m <sup>2</sup> | -                     | float areao(lat, lon) ;<br>areao:standard_name = "sea_area" ;<br>areao:long_name = "Sea area" ;<br>areao:units = "m2" ;<br>areao:unit_long = "square meters" ;<br>areao:valid_range = -3.f, 40.f ;<br>areao:_FillValue = -999.f ;<br>areao:missing_value = -999.f ;                                                                |
| <b>Hydrographic variables at tide gauge stations</b> | Sea level anomaly | sla           | Sea level anomaly                  | 1D        | time, lat, lon | m              | hourly averages       | float sla(time, lat, lon) ;<br>sla:standard_name = "sea_surface_height_above_sea_level" ;<br>sla:long_name = "Sea level anomalies" ;<br>sla:units = "m" ;<br>sla:unit_long = "meters" ;<br>sla:valid_range = -10.f, 10.f ;<br>sla:_FillValue = -999.f ;<br>sla:missing_value = -999.f ;                                            |
| <b>TABLE ATTACHED</b>                                |                   |               |                                    |           |                |                |                       |                                                                                                                                                                                                                                                                                                                                    |
| lat, lon are singleton dimensions                    |                   |               |                                    |           |                |                |                       |                                                                                                                                                                                                                                                                                                                                    |

|                                                                                                                                       |                             |        |                                    |    |                       |                    |                         |                                                                                                                                                                                                                                                                                                                            |
|---------------------------------------------------------------------------------------------------------------------------------------|-----------------------------|--------|------------------------------------|----|-----------------------|--------------------|-------------------------|----------------------------------------------------------------------------------------------------------------------------------------------------------------------------------------------------------------------------------------------------------------------------------------------------------------------------|
| <p><b>Hydrographic variables at representative stations</b></p> <p><b>TABLE ATTACHED</b></p> <p>lat, lon are singleton dimensions</p> | Potential Temperature       | thetao | Temperature of sea water           | 2D | time, depth, lat, lon | degree Celsius     | At least daily averages | <pre>float thetao(time, depth, lat, lon) ; thetao:standard_name = "sea_water_potential_temperature" ; thetao:long_name = "Potential temperature" ; thetao:units = "degrees_C" ; thetao:unit_long = "degree Celsius" ; thetao:valid_range = -3.f, 40.f ; thetao:_FillValue = -999.f ; thetao:missing_value = -999.f ;</pre> |
|                                                                                                                                       | Salinity                    | so     | Salinity of sea water              | 2D | time, depth, lat, lon | g kg <sup>-1</sup> | At least daily averages | <pre>float so(time, depth, lat, lon) ; so:standard_name = "sea_water_salinity" ; so:long_name = "Salinity" ; so:units = "0.001" ; so:unit_long = "practical salinity unit" ; so:valid_range = 0.f, 40.f ; so:_FillValue = -999.f ; so:missing_value = -999.f ;</pre>                                                       |
|                                                                                                                                       | Zonal current velocity      | uo     | Ocean current in x-direction       | 2D | time, depth, lat, lon | m s <sup>-1</sup>  | At least daily averages | <pre>float uo(time, depth, lat, lon) ; uo:standard_name = "eastward_sea_water_velocity" ; uo:long_name = "Eastward current" ; uo:units = "m s-1" ; uo:unit_long = "meters per second" ; uo:_FillValue = -999.f ; uo:missing_value = -999.f ;</pre>                                                                         |
|                                                                                                                                       | Meridional current velocity | vo     | Ocean current in y-direction       | 2D | time, depth, lat, lon | m s <sup>-1</sup>  | At least daily averages | <pre>float vo(time, depth, lat, lon) ; vo:standard_name = "northward_sea_water_velocity" ; vo:long_name = "Northward current" ; vo:units = "m s-1" ; vo:unit_long = "meters per second" ; vo:_FillValue = -999.f ; vo:missing_value = -999.f ;</pre>                                                                       |
|                                                                                                                                       | Age of water                | age    | Age of water since surface contact | 2D | time, depth, lat, lon | s                  | At least daily averages | <pre>float age(time, depth, lat, lon) ; age:standard_name = "sea_water_age_since_surface_contact" ; age:long_name = "Sea water age since surface contact" ; age:units = "s" ; age:unit_long = "seconds" ; age:_FillValue = -999.f ; age:missing_value = -999.f ;</pre>                                                     |
|                                                                                                                                       |                             |        |                                    |    |                       |                    |                         |                                                                                                                                                                                                                                                                                                                            |

|                      |                                 |           |                                                                                             |    |                |                    |                                                           |                                                                                                                                                                                                                                                                                                                                                                           |
|----------------------|---------------------------------|-----------|---------------------------------------------------------------------------------------------|----|----------------|--------------------|-----------------------------------------------------------|---------------------------------------------------------------------------------------------------------------------------------------------------------------------------------------------------------------------------------------------------------------------------------------------------------------------------------------------------------------------------|
| Horizontal 2D fields | Sea surface temperature         | surfaceT  | Sea surface temperature                                                                     | 3D | time, lat, lon | degree Celsius     | Daily averages                                            | float surfaceT(time, lat, lon) ;<br>surfaceT:standard_name = "sea_surface_temperature" ;<br>surfaceT:long_name = "Sea surface temperature" ;<br>surfaceT:units = "degrees_C" ;<br>surfaceT:unit_long = "degree Celsius" ;<br>surfaceT:valid_range = -3.f, 40.f ;<br>surfaceT:_FillValue = -999.f ;<br>surfaceT:missing_value = -999.f ;                                   |
|                      | Sea floor potential temperature | bottomT   | Sea floor temperature                                                                       | 3D | time, lat, lon | degree Celsius     | Daily averages                                            | float bottomT(time, lat, lon) ;<br>bottomT:standard_name = "sea_water_potential_temperature_at_sea_floor" ;<br>bottomT:long_name = "Sea water potential temperature at sea floor" ;<br>bottomT:units = "degrees_C" ;<br>bottomT:unit_long = "degree Celsius" ;<br>bottomT:valid_range = -3.f, 40.f ;<br>bottomT:_FillValue = -999.f ;<br>bottomT:missing_value = -999.f ; |
|                      | Sea surface salinity            | surfaceS  | Sea surface salinity                                                                        | 3D | time, lat, lon | g kg <sup>-1</sup> | Daily averages                                            | float surfaceS(time, lat, lon) ;<br>surfaceS:standard_name = "sea_surface_salinity" ;<br>surfaceS:long_name = "Sea surface salinity" ;<br>surfaceS:units = "0.001" ;<br>surfaceS:unit_long = "practical salinity unit" ;<br>surfaceS:valid_range = 0.f, 40.f ;<br>surfaceS:_FillValue = -999.f ;<br>surfaceS:missing_value = -999.f ;                                     |
|                      | Sea floor salinity              | bottomS   | Sea floor salinity                                                                          | 3D | time, lat, lon | g kg <sup>-1</sup> | Daily averages                                            | float bottomS(time, lat, lon) ;<br>bottomS:standard_name = "sea_water_salinity_at_sea_floor" ;<br>bottomS:long_name = "Sea water salinity at sea floor" ;<br>bottomS:units = "0.001" ;<br>bottomS:unit_long = "practical salinity unit" ;<br>bottomS:valid_range = 0.f, 40.f ;<br>bottomS:_FillValue = -999.f ;<br>bottomS:missing_value = -999.f ;                       |
|                      | Bottom age of water             | bottomAge | the length of time elapsed since the sea water in a grid cell was last in the surface level | 3D | time, lat, lon | s                  | Daily averages                                            | float bottomAge(time, lat, lon) ;<br>bottomAge:standard_name = "sea_water_age_since_surface_contact_at_sea_floor" ;<br>bottomAge:long_name = "Sea water age since surface contact at sea floor" ;<br>bottomAge:units = "s" ;<br>bottomAge:unit_long = "seconds" ;<br>bottomAge:_FillValue = -999.f ;<br>bottomAge:missing_value = -999.f ;                                |
|                      | Thermocline depth               | td        | SEPARATE ALGORITHM ATTACHED                                                                 | 3D | time, lat, lon | m                  | Daily averages, or calculated from daily S and T averages | float td(time, lat, lon) ;<br>ts:standard_name = "thermocline_depth" ;<br>ts:long_name = "Thermocline depth" ;<br>ts:units = "m" ;<br>ts:unit_long = "meters" ;<br>ts:_FillValue = -999.f ;<br>ts:missing_value = -999.f ;                                                                                                                                                |

|  |                                                     |     |                             |    |                |        |                                                           |                                                                                                                                                                                                                                                                                                            |
|--|-----------------------------------------------------|-----|-----------------------------|----|----------------|--------|-----------------------------------------------------------|------------------------------------------------------------------------------------------------------------------------------------------------------------------------------------------------------------------------------------------------------------------------------------------------------------|
|  | Thermocline strength                                | tg  | SEPARATE ALGORITHM ATTACHED | 3D | time, lat, lon | K/m    | Daily averages, or calculated from daily S and T averages | float tg(time, lat, lon) ;<br>tg:standard_name = "thermocline_gradient" ;<br>tg:long_name = "Thermocline gradient" ;<br>tg:units = "K/m" ;<br>tg:unit_long = "Kelvin per meter" ;<br>tg:_FillValue = -999.f ;<br>tg:missing_value = -999.f ;                                                               |
|  | Halocline depth                                     | sd  | SEPARATE ALGORITHM ATTACHED | 3D | time, lat, lon | m      | Daily averages, or calculated from daily S and T averages | float sd(time, lat, lon) ;<br>sd:standard_name = "halocline_depth" ;<br>sd:long_name = "Halocline depth" ;<br>sd:units = "m" ;<br>sd:unit_long = "meters" ;<br>sd:_FillValue = -999.f ;<br>sd:missing_value = -999.f ;                                                                                     |
|  | Halocline strength                                  | sg  | SEPARATE ALGORITHM ATTACHED | 3D | time, lat, lon | g/kg/m | Daily averages, or calculated from daily S and T averages | float sg(time, lat, lon) ;<br>sg:standard_name = "halocline_gradient" ;<br>sg:long_name = "Halocline gradient" ;<br>sg:units = "g/kg/m" ;<br>sg:unit_long = "grams per kilogram and meter" ;<br>sg:_FillValue = -999.f ;<br>sg:missing_value = -999.f ;                                                    |
|  | Pycnocline depth                                    | rd  | SEPARATE ALGORITHM ATTACHED | 3D | time, lat, lon | M      | Daily averages, or calculated from daily S and T averages | float rd(time, lat, lon) ;<br>rd:standard_name = "pycnocline_depth" ;<br>rd:long_name = "Pycnocline depth " ;<br>rd:units = "m" ;<br>rd:unit_long = "meters" ;<br>rd:_FillValue = -999.f ;<br>rd:missing_value = -999.f ;                                                                                  |
|  | Pycnocline strength                                 | rg  | SEPARATE ALGORITHM ATTACHED | 3D | time, lat, lon | kg/m4  | Daily averages, or calculated from daily S and T averages | float rg(time, lat, lon) ;<br>rg:standard_name = "pycnocline_gradient " ;<br>rg:long_name = "Pycnocline gradient " ;<br>rg:units = "kg/m4" ;<br>rg:unit_long = "kilograms per cubic meter and meter" ;<br>rg:_FillValue = -999.f ;<br>rg:missing_value = -999.f ;                                          |
|  | Thermocline depth based on thermal density gradient | rtd | SEPARATE ALGORITHM ATTACHED | 3D | time, lat, lon | m      | Daily averages, or calculated from daily S and T averages | float rtd(time, lat, lon) ;<br>rtd:standard_name = "thermocline_depth_based_on_density" ;<br>rtd:long_name = "Thermocline depth based on density" ;<br>rtd:units = "m" ;<br>rtd:unit_long = "meters" ;<br>rtd:_FillValue = -999.f ;<br>rtd:missing_value = -999.f ;                                        |
|  | Thermocline depth based on thermal density gradient | rtg | SEPARATE ALGORITHM ATTACHED | 3D | time, lat, lon | kg/m4  | Daily averages, or calculated from daily S and T averages | float rtg(time, lat, lon) ;<br>rtg:standard_name = "thermocline_gradient_based_on_density" ;<br>rtg:long_name = "Thermocline gradient based on density" ;<br>rtg:units = "kg/m4" ;<br>rtg:unit_long = "kilograms per cubic meter and meter" ;<br>rtg:_FillValue = -999.f ;<br>rtg:missing_value = -999.f ; |



|                                                                             |                         |          |                                                                                                                                                                                                                                       |    |                                      |                    |                |                                                                                                                                                                                                                                                                                                                            |
|-----------------------------------------------------------------------------|-------------------------|----------|---------------------------------------------------------------------------------------------------------------------------------------------------------------------------------------------------------------------------------------|----|--------------------------------------|--------------------|----------------|----------------------------------------------------------------------------------------------------------------------------------------------------------------------------------------------------------------------------------------------------------------------------------------------------------------------------|
| Horizontally integrated fields                                              | Sea ice extent          | siextent | Sum over the total areas of grid cells filled with >=10% ice on daily average<br>To follow CF Conventions, the threshold must be specified by supplying a scalar coordinate variable with the standard name of sea_ice_area_fraction. | 1D | time                                 | m <sup>2</sup>     | Daily averages | <pre>float siextent(time) ; siextent:standard_name = "sea_ice_extent " ; siextent:long_name = "Sea ice extent" ; siextent:units = "m2" ; siextent:unit_long = "square meters" ; siextent:_FillValue = -999.f ; siextent:missing_value = -999.f ;</pre>                                                                     |
|                                                                             | Overturning circulation | oc       | SEPARATE ALGORITHM ATTACHED                                                                                                                                                                                                           | 3D | Time, depth, along-thalweg grid cell | m <sup>3</sup> /s  | Daily averages | <pre>float oc(time) ; oc:standard_name = "overturning_circulation " ; oc:long_name = "Overturning cicalation" ; oc:units = "m3/s" ; oc:unit_long = "cubic meters per second" ; oc:_FillValue = -999.f ; oc:missing_value = -999.f ;</pre>                                                                                  |
| Transects<br>TABLE ATTACHED<br>One of the lat, lon is a singleton dimension | Potential Temperature   | thetao   | Temperature of sea water                                                                                                                                                                                                              | 3D | time, depth, lat, lon                | degree Celsius     | Daily averages | <pre>float thetao(time, depth, lat, lon) ; thetao:standard_name = "sea_water_potential_temperature" ; thetao:long_name = "Potential temperature" ; thetao:units = "degrees_C" ; thetao:unit_long = "degree Celsius" ; thetao:valid_range = -3.f, 40.f ; thetao:_FillValue = -999.f ; thetao:missing_value = -999.f ;</pre> |
|                                                                             | Salinity                | so       | Salinity of sea water                                                                                                                                                                                                                 | 3D | time, depth, lat, lon                | g kg <sup>-1</sup> | Daily averages | <pre>float so(time, depth, lat, lon) ; so:standard_name = "sea_water_salinity" ; so:long_name = "Salinity" ; so:units = "0.001" ; so:unit_long = "practical salinity unit" ; so:valid_range = 0.f, 40.f ; so:_FillValue = -999.f ; so:missing_value = -999.f ;</pre>                                                       |

|                               |                             |         |                                                                                |    |                       |                        |                |                                                                                                                                                                                                                                                                                                                                                                            |
|-------------------------------|-----------------------------|---------|--------------------------------------------------------------------------------|----|-----------------------|------------------------|----------------|----------------------------------------------------------------------------------------------------------------------------------------------------------------------------------------------------------------------------------------------------------------------------------------------------------------------------------------------------------------------------|
|                               | Zonal volume transport      | uuo     | Eastward ocean current (in x-direction) multiplied by vertical cell thickness  | 3D | time, depth, lat, lon | m2 s <sup>-1</sup>     | Daily averages | float uuo(time, depth, lat, lon) ;<br>uuo:standard_name =<br>"eastward sea water velocity times cell thickness" ;<br>uuo:long_name = "Eastward sea water velocity times cell thickness" ;<br>uuo:units = "m2 s-1" ;<br>uuo:unit_long = "square meters per second" ;<br>uuo:_FillValue = -999999.f ;<br>uuo:missing_value = -999999.f ;                                     |
|                               | Meridional volume transport | vvo     | Northward ocean current (in x-direction) multiplied by vertical cell thickness | 3D | time, depth, lat, lon | m2 s <sup>-1</sup>     | Daily averages | float vvo(time, depth, lat, lon) ;<br>vvo:standard_name =<br>"eastward sea water velocity times cell thickness" ;<br>vvo:long_name = "Eastward sea water velocity times cell thickness" ;<br>vvo:units = "m2 s-1" ;<br>vvo:unit_long = "square meters per second" ;<br>vvo:_FillValue = -999999.f ;<br>vvo:missing_value = -999999.f ;                                     |
|                               | Grid cell thickness         | h       | Vertical extent of the grid cell                                               | 3D | time, depth, lat, lon | m                      | Daily averages | float h(time, depth, lat, lon) ;<br>h:standard_name="magnitude_of_derivative_of_position_wrt_model_level_number" ;<br>h:long_name = "Vertical thickness of grid cell" ;<br>h:units = "m" ;<br>h:unit_long = "meters" ;<br>h:_FillValue = -999.f ;<br>h:missing_value = -999.f ;                                                                                            |
|                               | Age of water                | age     | Age of water since surface contact                                             | 3D | time, depth, lat, lon | s                      | Daily averages | float age(time, depth, lat, lon) ;<br>age:standard_name =<br>"sea_water_age_since_surface_contact" ;<br>age:long_name = "Sea water age since surface contact" ;<br>age:units = "s" ;<br>age:unit_long = "seconds" ;<br>age:_FillValue = -999.f ;<br>age:missing_value = -999.f ;                                                                                           |
| (longitudinal transects only) | Zonal ocean heat transport  | xtransT | Heat transport density multiplied by vertical cell thickness                   | 3D | time, depth, lat, lon | W/m                    | Daily averages | float xtransT(time, depth, lat, lon) ;<br>xtransT:standard_name =<br>"eastward_ocean_heat_transport_divided_by_distance" ;<br>xtransT:long_name = "Eastward ocean heat transport divided by distance" ;<br>xtransT:units = "W m-1" ;<br>xtransT:unit_long = "Watts per meter" ;<br>xtransT:_FillValue = -1.e20f ;<br>xtransT:missing_value = -1.e20f ;                     |
| (longitudinal transects only) | Zonal ocean salt transport  | xtransS | Salt transport density multiplied by vertical cell thickness                   | 3D | time, depth, lat, lon | kg m-1 s <sup>-1</sup> | Daily averages | float xtransS(time, depth, lat, lon) ;<br>xtransS:standard_name =<br>"eastward_ocean_salt_transport_divided_by_distance" ;<br>xtransS:long_name = "Eastward ocean salt transport divided by distance" ;<br>xtransS:units = "kg m-1 s-1" ;<br>xtransS:unit_long = "kilograms per meter and second" ;<br>xtransS:_FillValue = -1.e20f ;<br>xtransS:missing_value = -1.e20f ; |



|                                                        |                                 |         |                                                                               |    |                       |                                |                   |                                                                                                                                                                                                                                                                                                                                                                           |
|--------------------------------------------------------|---------------------------------|---------|-------------------------------------------------------------------------------|----|-----------------------|--------------------------------|-------------------|---------------------------------------------------------------------------------------------------------------------------------------------------------------------------------------------------------------------------------------------------------------------------------------------------------------------------------------------------------------------------|
| (latitudinal transects only)                           | Meridional ocean heat transport | ytransT | Heat transport density multiplied by vertical cell thickness                  | 3D | time, depth, lat, lon | W/m                            | Daily averages    | float ytransT(time, depth, lat, lon) ;<br>ytransT:standard_name = "northward_ocean_heat_transport_divided_by_distance" ;<br>ytransT:long_name = "Northward ocean heat transport divided by distance" ;<br>ytransT:units = "W m-1" ;<br>ytransT:unit_long = "Watts per meter" ;<br>ytransT:_FillValue = -1.e20f ;<br>ytransT:missing_value = -1.e20f ;                     |
| (latitudinal transects only)                           | Meridional ocean salt transport | ytransS | Salt transport density multiplied by vertical cell thickness                  | 3D | time, depth, lat, lon | kg m-1 s <sup>-1</sup>         | Daily averages    | float ytransS(time, depth, lat, lon) ;<br>ytransS:standard_name = "northward_ocean_salt_transport_divided_by_distance" ;<br>ytransS:long_name = "Northward ocean salt transport divided by distance" ;<br>ytransS:units = "kg m-1 s-1" ;<br>ytransS:unit_long = "kilograms per meter and second" ;<br>ytransS:_FillValue = -1.e20f ;<br>ytransS:missing_value = -1.e20f ; |
| Upwelling areas<br>TABLE ATTACHED<br>From 1990 on only | Potential Temperature           | thetao  | Temperature of sea water                                                      | 3D | time, depth, lat, lon | degree Celsius                 | 3-hourly averages | float thetao(time, depth, lat, lon) ;<br>thetao:standard_name = "sea_water_potential_temperature" ;<br>thetao:long_name = "Potential temperature" ;<br>thetao:units = "degrees_C" ;<br>thetao:unit_long = "degree Celsius" ;<br>thetao:valid_range = -3.f, 40.f ;<br>thetao:_FillValue = -999.f ;<br>thetao:missing_value = -999.f ;                                      |
|                                                        | Salinity                        | so      | Salinity of sea water                                                         | 3D | time, depth, lat, lon | g kg <sup>-1</sup>             | 3-hourly averages | float so(time, depth, lat, lon) ;<br>so:standard_name = "sea_water_salinity" ;<br>so:long_name = "Salinity" ;<br>so:units = "0.001" ;<br>so:unit_long = "practical salinity unit" ;<br>so:valid_range = 0.f, 40.f ;<br>so:_FillValue = -999.f ;<br>so:missing_value = -999.f ;                                                                                            |
|                                                        | Zonal volume transport          | uuo     | Eastward ocean current (in x-direction) multiplied by vertical cell thickness | 3D | time, depth, lat, lon | m <sup>2</sup> s <sup>-1</sup> | 3-hourly averages | float uuo(time, depth, lat, lon) ;<br>uuo:standard_name = "eastward_sea_water_velocity_times_cell_thickness" ;<br>uuo:long_name = "Eastward sea water velocity times cell thickness" ;<br>uuo:units = "m2 s-1" ;<br>uuo:unit_long = "square meters per second" ;<br>uuo:_FillValue = -999999.f ;<br>uuo:missing_value = -999999.f ;                                       |

|  |                             |     |                                                                                |    |                       |              |                   |                                                                                                                                                                                                                                                                                                                              |
|--|-----------------------------|-----|--------------------------------------------------------------------------------|----|-----------------------|--------------|-------------------|------------------------------------------------------------------------------------------------------------------------------------------------------------------------------------------------------------------------------------------------------------------------------------------------------------------------------|
|  | Meridional volume transport | vvo | Northward ocean current (in x-direction) multiplied by vertical cell thickness | 3D | time, depth, lat, lon | $m^2 s^{-1}$ | 3-hourly averages | <pre>float vvo(time, depth, lat, lon) ; vvo:standard_name = "eastward sea water velocity times cell thickness" ; vvo:long_name = "Eastward sea water velocity times cell thickness" ; vvo:units = "m2 s-1" ; vvo:unit_long = "square meters per second" ; vvo:_FillValue = -999999.f ; vvo:missing_value = -999999.f ;</pre> |
|  | Grid cell thickness         | h   | Vertical extent of the grid cell                                               | 3D | time, depth, lat, lon | m            | 3-hourly averages | <pre>float h(time, depth, lat, lon) ; h:standard_name="magnitude_of_derivative_of_position_wrt_model_level_number" ; h:long_name = "Vertical thickness of grid cell" ; h:units = "m" ; h:unit_long = "meters" ; h:_FillValue = -999.f ; h:missing_value = -999.f ;</pre>                                                     |
|  | Age of water                | age | Age of water since surface contact                                             | 3D | time, depth, lat, lon | s            | Daily averages    | <pre>float age(time, depth, lat, lon) ; age:standard_name = "sea_water_age_since_surface_contact" ; age:long_name = "Sea water age since surface contact" ; age:units = "s" ; age:unit_long = "seconds" ; age:_FillValue = -999.f ; age:missing_value = -999.f ;</pre>                                                       |
