# Supplementary material for: The Baltic Sea Model Intercomparison Project (BMIP) – a platform for model development, evaluation, and uncertainty assessment
Source: Copernicus journal article supplement (doi:10.5194/gmd-15-8613-2022), 2022-11-25
Supplement: Supplementary file [file gmd-15-8613-2022-supplement-title-page.pdf › gmd-15-8613-2022-supplement-title-page.pdf]

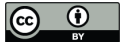

*Supplement of*

## **The Baltic Sea Model Intercomparison Project (BMIP) – a platform for model development, evaluation, and uncertainty assessment**

**Matthias Gröger et al.**

*Correspondence to:* Matthias Gröger ([matthias.groeger@io-warnemuende.de](mailto:matthias.groeger@io-warnemuende.de))

- [gmd-15-8613-2022-supplement-title-page.pdf](#)
- [S5\\_GETM-GOTM-FABM-UERRA.tar.bz2](#)
- [S6\\_bmip\\_instructions\\_final\\_2022-06-13.pdf](#)
- [supplement\\_S1\\_S5.pdf](#)

The copyright of individual parts of the supplement might differ from the article licence.
